# Supplementary material for: Transcriptomic comparison of Drosophila snRNP biogenesis mutants reveals mutant-specific changes in pre-mRNA processing: implications for spinal muscular atrophy
Source: PubMed Central journal article supplement — RNA. 2016 Aug;22(8):1215–27. doi: 10.1261/rna.057208.116 (PMC4931114; doi:10.1261/rna.057208.116), 2016-08
Supplement: supp_057208.116_Supplemental_Fig_S1.pdf [file supp_057208.116_Supplemental_Fig_S1.pdf]

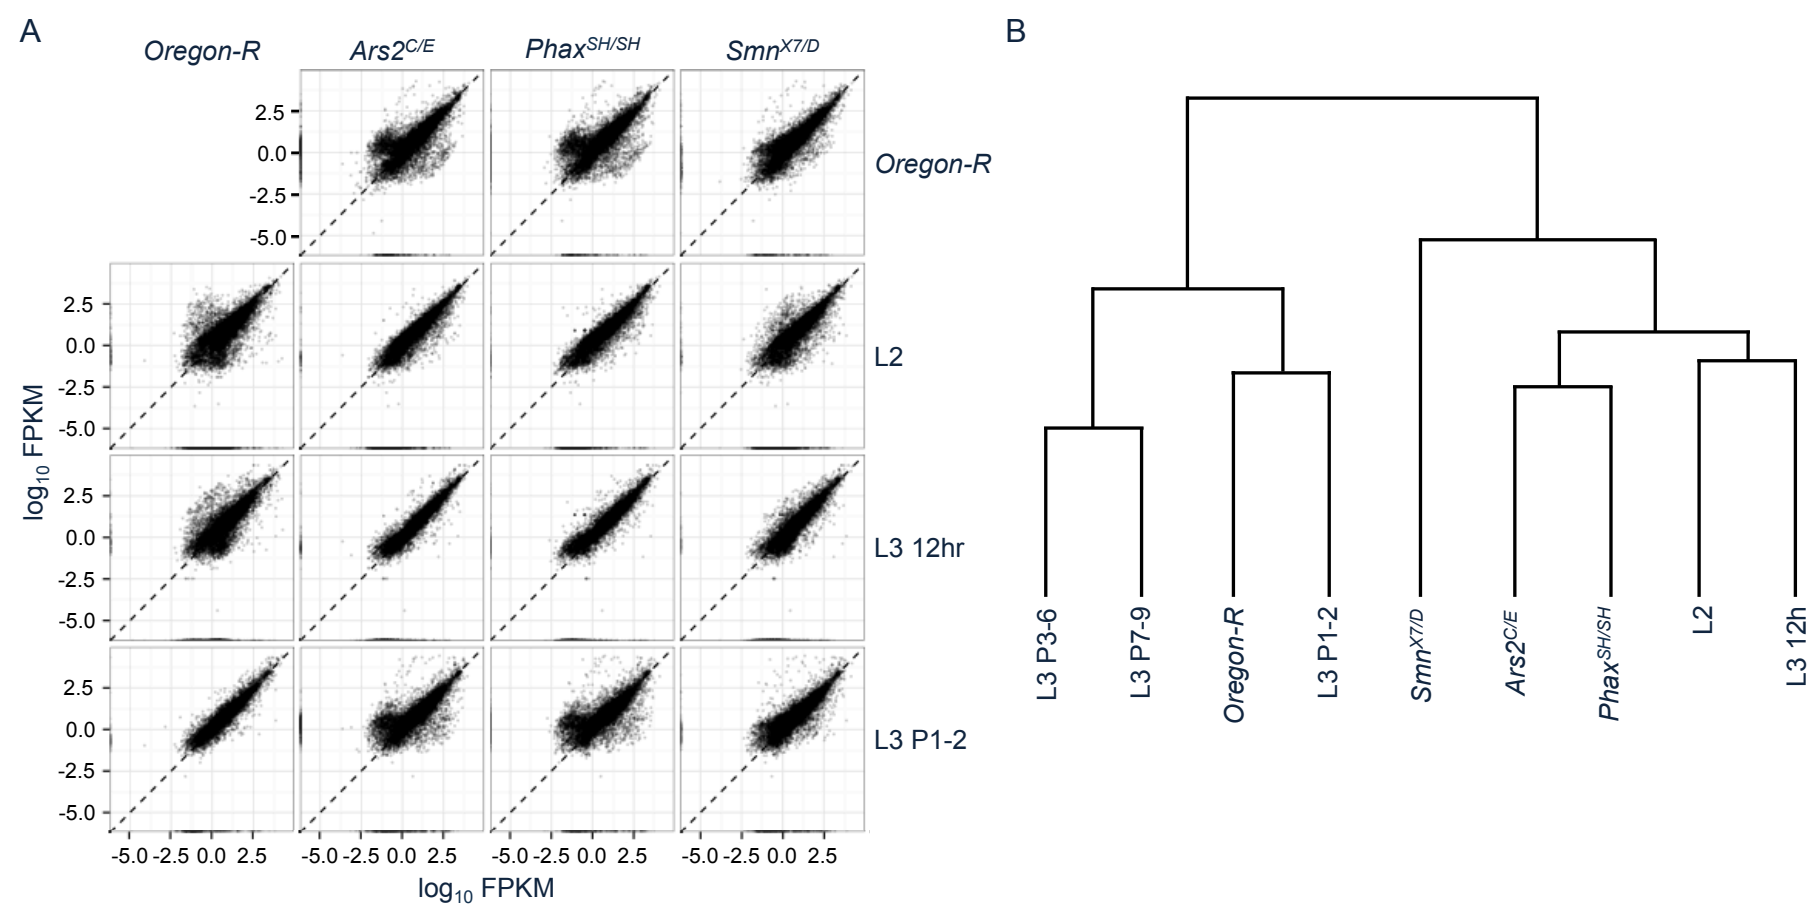

**Supplemental Figure S1.** Timing of the developmental delays exhibited by the snRNP biogenesis mutants. (A) Pairwise comparisons of Cuffdiff  $\log_{10}$ FPKM levels from age-matched *Oregon-R* and snRNP biogenesis mutants relative to modENCODE developmentally-staged controls for second instar (L2), early 3<sup>rd</sup> instar (L3 12h), and a later “puff” stage of 3<sup>rd</sup> instar (L3 P1-2) *wild-type* larvae. Individual points represent individual genes or loci containing multiple genes that were not disambiguated by the Cuffdiff differential expression analysis. (B) Dendrogram comparison of overall gene expression between age-matched *Oregon-R*, snRNP biogenesis mutants, and modENCODE developmentally staged animals. L3 P3-6 and L3 P7-9 are subsequent 3<sup>rd</sup> instar stages relative to L3 P1-2. The dendrogram is an alternate hierarchical clustering representation of the data presented in Fig. S1A.
