# Supplementary material for: Transcriptomic comparison of Drosophila snRNP biogenesis mutants reveals mutant-specific changes in pre-mRNA processing: implications for spinal muscular atrophy
Source: PubMed Central journal article supplement — RNA. 2016 Aug;22(8):1215–27. doi: 10.1261/rna.057208.116 (PMC4931114; doi:10.1261/rna.057208.116), 2016-08
Supplement: supp_057208.116_Supplemental_Fig_S3.pdf [file supp_057208.116_Supplemental_Fig_S3.pdf]

A

## U1 snRNA isoforms

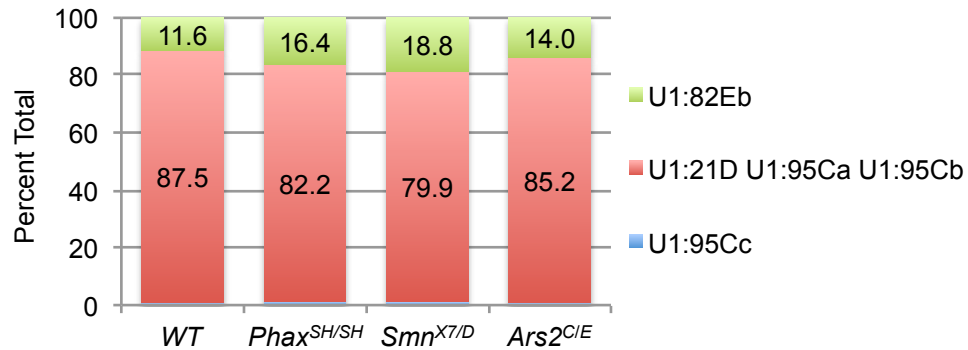

B

## U2 snRNA isoforms

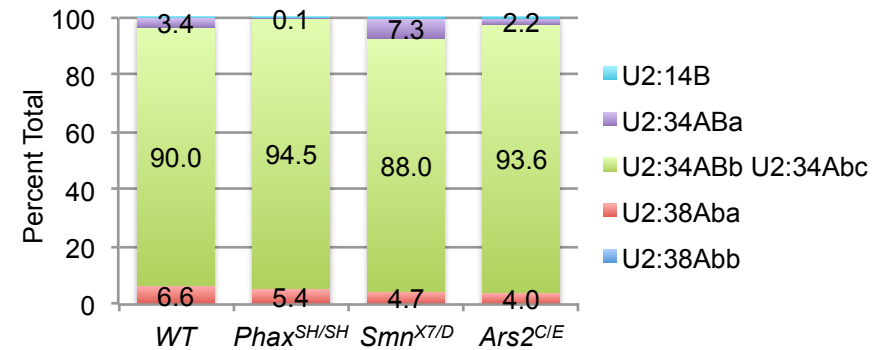

C

## U4 snRNA isoforms

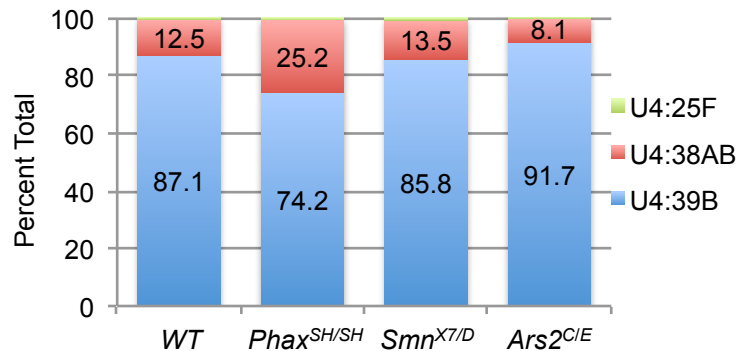

D

## U5 snRNA isoforms

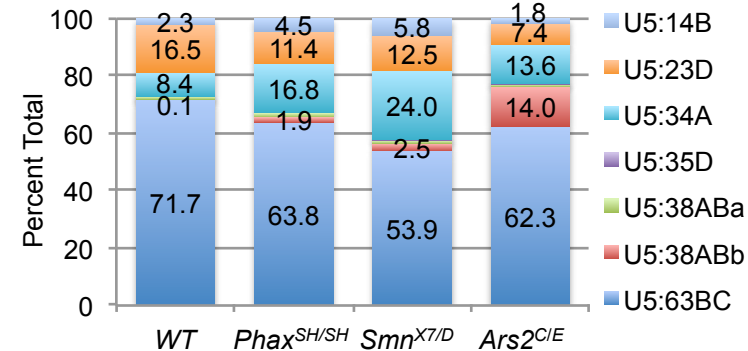

**Supplemental Figure S3.** Relative abundance of snRNA isoforms in snRNP biogenesis mutants: (A) U1 snRNA paralogs; (B) U2 snRNA paralogs; (C) U4 snRNA paralogs; and (D) U5 snRNA paralogs. Identical isoforms are listed together.
