# Supplementary material for: Transcriptomic comparison of Drosophila snRNP biogenesis mutants reveals mutant-specific changes in pre-mRNA processing: implications for spinal muscular atrophy
Source: PubMed Central journal article supplement — RNA. 2016 Aug;22(8):1215–27. doi: 10.1261/rna.057208.116 (PMC4931114; doi:10.1261/rna.057208.116), 2016-08
Supplement: supp_057208.116_Supplemental_Fig_S5.pdf [file supp_057208.116_Supplemental_Fig_S5.pdf]

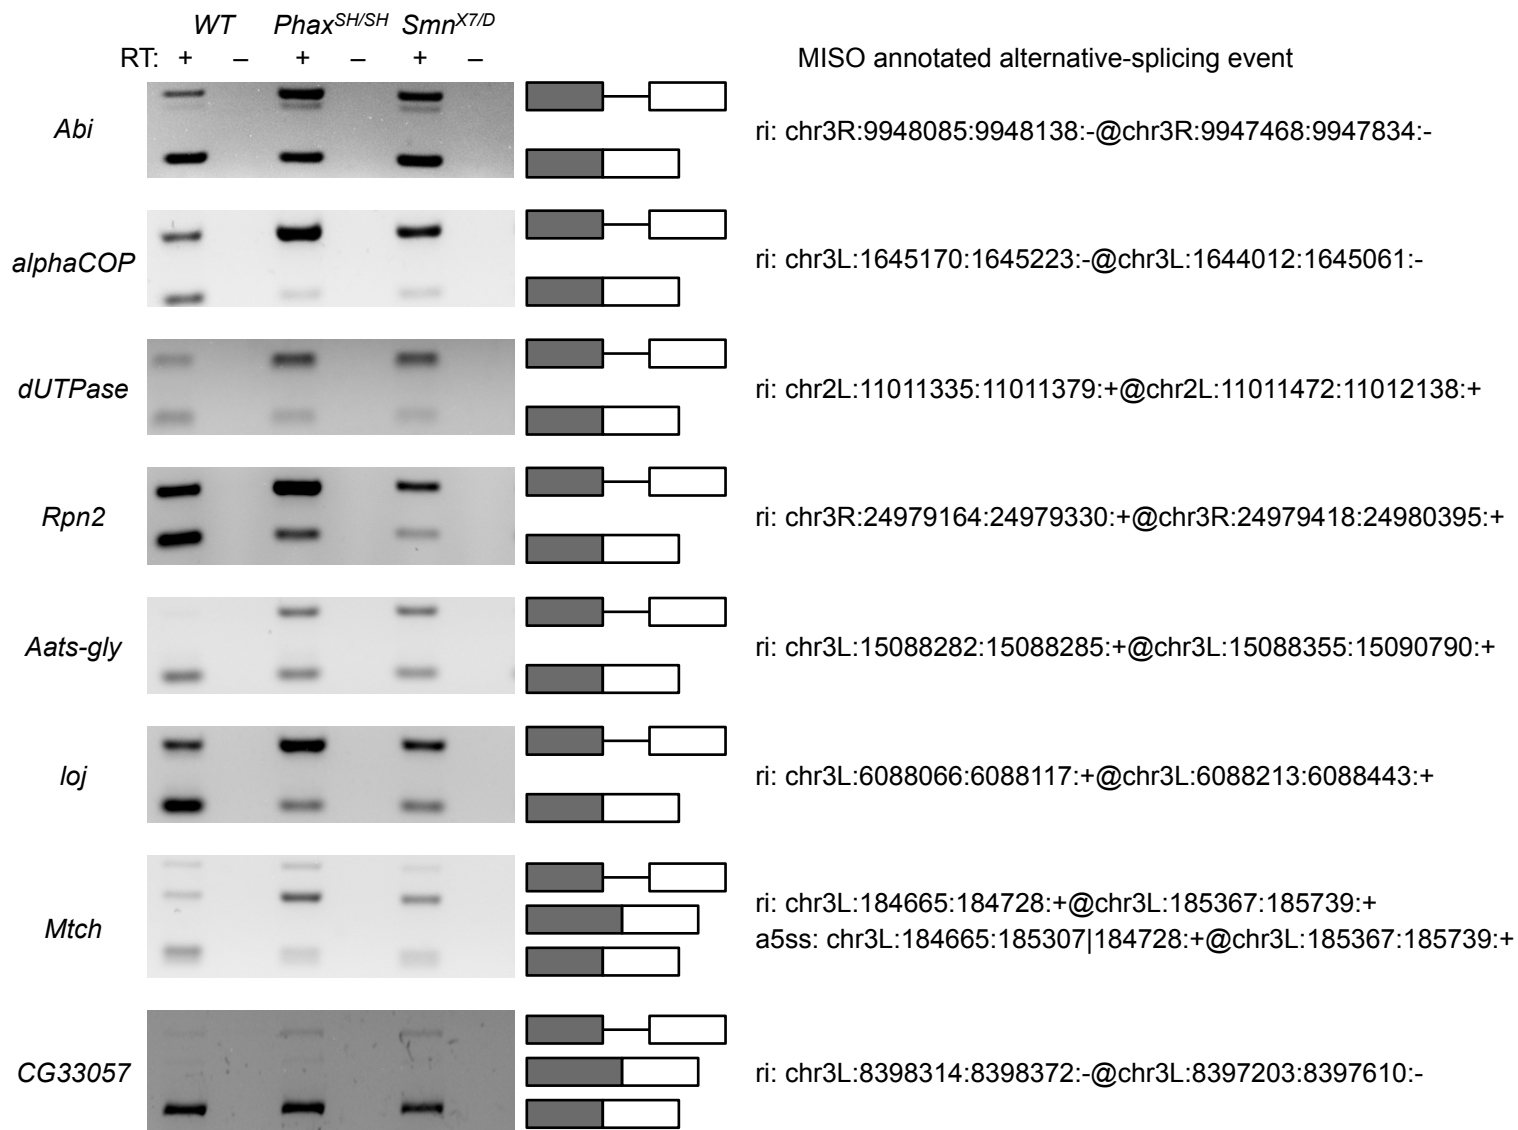

**Supplemental Figure S5.** Semi-quantitative RT-PCR of alternative-splicing changes identified by RNA-seq. MISO alternative-splicing event annotations are listed.
