# Supplementary material for: Transcriptomic comparison of Drosophila snRNP biogenesis mutants reveals mutant-specific changes in pre-mRNA processing: implications for spinal muscular atrophy
Source: PubMed Central journal article supplement — RNA. 2016 Aug;22(8):1215–27. doi: 10.1261/rna.057208.116 (PMC4931114; doi:10.1261/rna.057208.116), 2016-08
Supplement: supp_057208.116_Supplemental_Fig_S6.pdf [file supp_057208.116_Supplemental_Fig_S6.pdf]

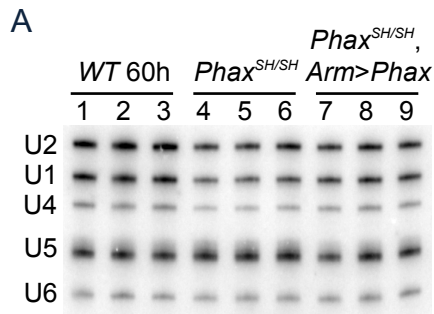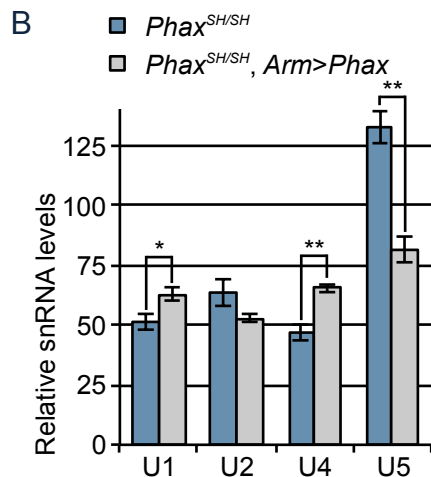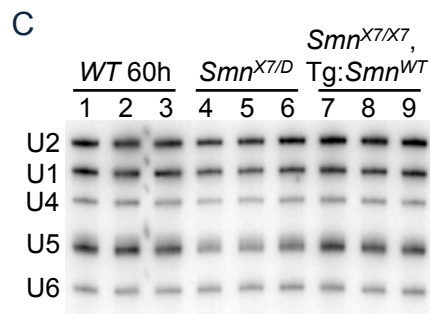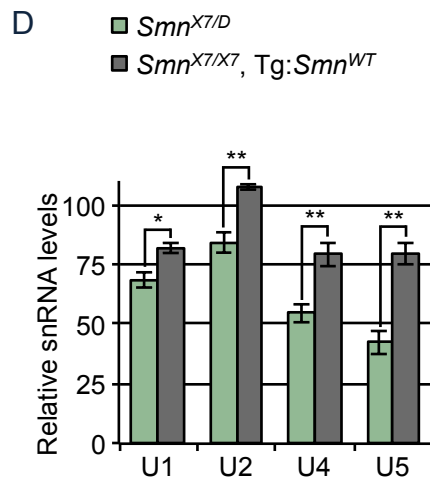

**Supplemental Figure S6.** Analysis of snRNA levels in transgenic rescue lines. (A) Northern blot of snRNA in the *Phax* mutant and *Phax* rescue line (*Arm>Phax*) relative to WT 60h larvae; quantified in panel (B). (C) Northern blot of snRNA levels in the *Smn* mutant and *Smn* rescue line (*Tg:Smn*<sup>WT</sup>) relative to WT 60h; quantified in panel (D). U6-normalized snRNA levels of WT were set at 100.
