# Supplementary material for: Transcriptomic comparison of Drosophila snRNP biogenesis mutants reveals mutant-specific changes in pre-mRNA processing: implications for spinal muscular atrophy
Source: PubMed Central journal article supplement — RNA. 2016 Aug;22(8):1215–27. doi: 10.1261/rna.057208.116 (PMC4931114; doi:10.1261/rna.057208.116), 2016-08
Supplement: supp_057208.116_Supplemental_Fig_S7.pdf [file supp_057208.116_Supplemental_Fig_S7.pdf]

## A Earlier - 3<sup>rd</sup> instar

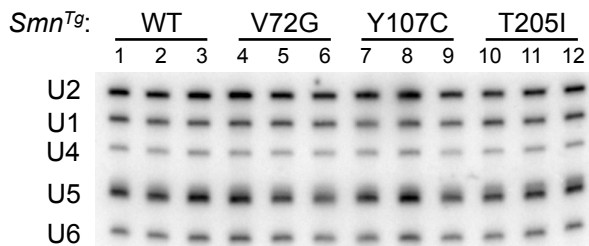

B

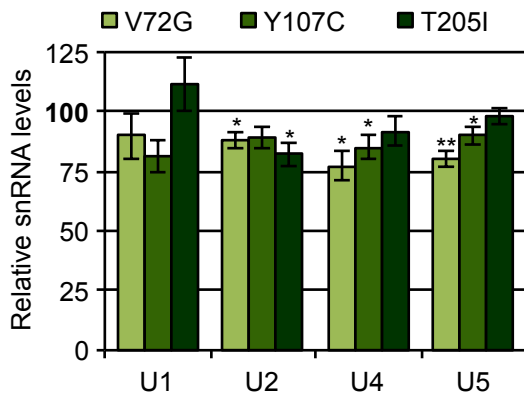

C

## Later – Prepupae

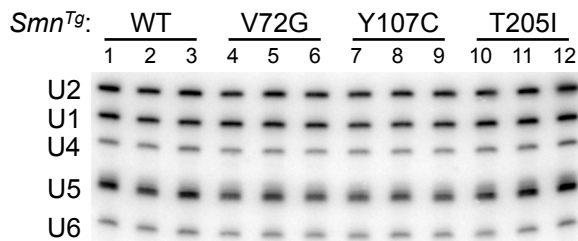

D

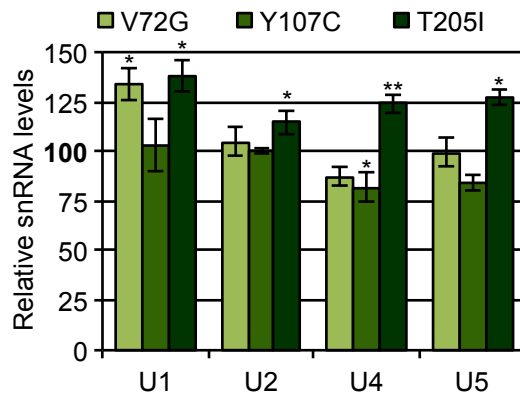

**Supplemental Figure S7.** Lack of snRNA level decreases in *Smn* missense mutants over development. (A&C) Northern blots of snRNA levels in the *SMN* missense mutants over development, quantified in (B&D). snRNA levels from the *Smn*<sup>WT</sup> (WT) transgenic lines were set at 100. Pupal animals were staged by color and internal air bubble, and larval animals were from a timed collection (72-77 hours post egg laying). The small differences in the early larval stage likely reflect differences in developmental timing, as the *Smn* missense mutants exhibit slower developmental progression.
