# Supplementary material for: Transcriptomic comparison of Drosophila snRNP biogenesis mutants reveals mutant-specific changes in pre-mRNA processing: implications for spinal muscular atrophy
Source: PubMed Central journal article supplement — RNA. 2016 Aug;22(8):1215–27. doi: 10.1261/rna.057208.116 (PMC4931114; doi:10.1261/rna.057208.116), 2016-08
Supplement: supp_057208.116_Supplemental_Fig_S8.pdf [file supp_057208.116_Supplemental_Fig_S8.pdf]

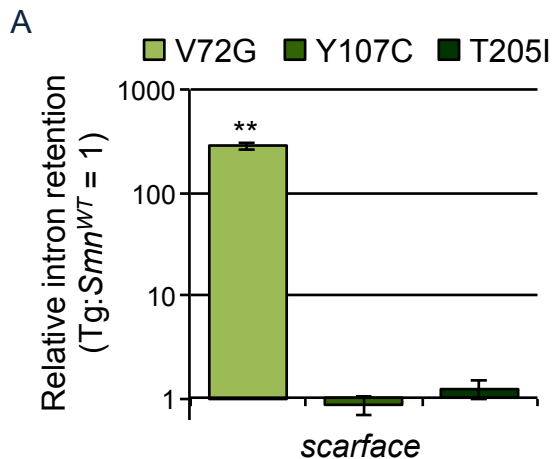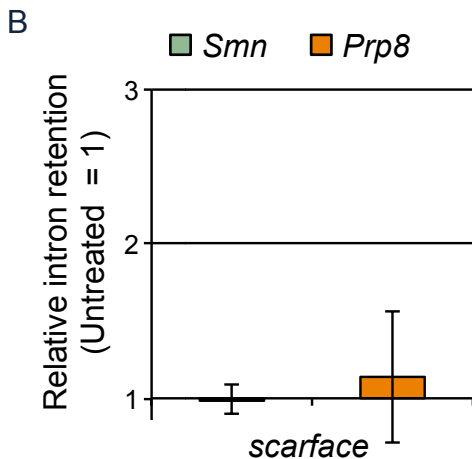

**Supplemental Figure S8.** Intron retention in *scarface* transcript.

(A) qRT-PCR analysis of intron retention of flies expressing SMA patient-derived missense mutations. Transgenic animals of the following generalized genotype were used: *Smn*<sup>X7/X7</sup>, *Flag-Smn*<sup>Tg/-</sup>, where Tg represents a WT, V72G, Y107C, or T205I transgene. Intron retention in the *Smn*<sup>WT</sup> transgenic rescue line was set at 1.

(B) qRT-PCR of untreated cells versus cells treated with dsRNA for *Smn* or *Prp8* mRNAs.
