# Supplementary material for: Transcriptomic comparison of Drosophila snRNP biogenesis mutants reveals mutant-specific changes in pre-mRNA processing: implications for spinal muscular atrophy
Source: PubMed Central journal article supplement — RNA. 2016 Aug;22(8):1215–27. doi: 10.1261/rna.057208.116 (PMC4931114; doi:10.1261/rna.057208.116), 2016-08
Supplement: supp_057208.116_Supplemental_Table_S12.pdf [file supp_057208.116_Supplemental_Table_S12.pdf]

**Supplemental Table 12:** Transgenic *Phax* rescue

| strain                                            | n   | % live animals |        |
|---------------------------------------------------|-----|----------------|--------|
|                                                   |     | pupae          | adults |
| <i>Oregon-R</i>                                   | 227 | 95.6           | 93.0   |
| <i>Phax</i> <sup>SH/SH</sup> , <i>UAS-Phax</i>    | 225 | 45.3           | 0.0    |
| <i>Phax</i> <sup>SH/SH</sup> , <i>Arm&gt;Phax</i> | 219 | 64.4*          | 30.1*  |

\*Fishers exact *p*-value < 0.0001
