# Supplementary material for: Transcriptomic comparison of Drosophila snRNP biogenesis mutants reveals mutant-specific changes in pre-mRNA processing: implications for spinal muscular atrophy
Source: PubMed Central journal article supplement — RNA. 2016 Aug;22(8):1215–27. doi: 10.1261/rna.057208.116 (PMC4931114; doi:10.1261/rna.057208.116), 2016-08
Supplement: supp_057208.116_Supplemental_Table_S22.pdf [file supp_057208.116_Supplemental_Table_S22.pdf]

**Supplemental Table 22:** Primers and probes used in this study. (Oligonucleotides are 5' to 3')

| snRNA | Northern probe                                  |  |
|-------|-------------------------------------------------|--|
| U1    | GAATAATCGCAGAGGTCAACTCAGCCGAGGT                 |  |
| U2    | TCCGTCTGATTCCAAAAATCAGTTTAAACATTTGTTGTCCTCCAAT  |  |
| U4    | GGGGTATTGGTTAAAGTTTTCAACTAGCAATAATCGCACCTCAGTAG |  |
| U5    | GACTCATTAGAGTGTTCCTCTCCACGGAAATCTTTAGTAAAAGGC   |  |
| U6    | CTTCTCTGTATCGTTCCAATTTTAGTATATGTTCTGCCGAAGCAAGA |  |

  

| gene            | qPCR Forward primer                  | qPCR Reverse primer                 | Junction spanned |
|-----------------|--------------------------------------|-------------------------------------|------------------|
| <i>Abi</i>      | GCATCTGTTGTGCAATCGCATAGTCAATAAAGTGAG | CCGCACTTTTCACGCCGTAAACATTTG         | exon-intron      |
| <i>Abi</i>      | GCATCTGTTGTGCAATCGCATAGTCAATAAACATCC | GATCTCGGTGCGTATCAGAGAGGCTAGTTC      | exon-exon        |
| <i>alphaCOP</i> | ATAATTGACGTGTCACAATTTTCGACGATTGGTTGG | GAGGTGGGTGTTAGAACAAACCATTTTATTGATAC | exon-intron      |
| <i>alphaCOP</i> | ATAATTGACGTGTCACAATTTTCGACGATTGGCAAG | CTGTAGGTGTCTCAAATGGATGCACTTCTAGGT   | exon-exon        |
| <i>UTPase</i>   | CCGCGTTATTTTCAGACCAGAATTCGCAAGTAAG   | CGGCGAAATCGGTTGATGGCATTG            | exon-intron      |
| <i>UTPase</i>   | CGTTATTTTCAGACCAGAATTCGCAACTGCC      | TCACCGGCTCCAAAGCATTTCTCG            | exon-exon        |
| <i>Rpn2</i>     | AAGAAAACGAAAATTAACCGGTGCAATGTTGGTTAG | CTACGGATTTAAAGTGACGTATGTTCAACTTGGGC | exon-intron      |
| <i>Rpn2</i>     | AAGAAAACGAAAATTAACCGGTGCAATGTTGAACAT | GGCGAACACCTTAAGATCCGGCATTG          | exon-exon        |
| <i>scaf</i>     | GCGAAATTAGCGCCATAAAC                 | CCAGTTGTTCCCCCTATGAA                | exon-intron      |
| <i>scaf</i>     | GTAAGAAGCAAGGACCCAAC                 | GCGAGCACTGCTGGTTTC                  | exon-exon        |
| <i>CG6841</i>   | GACTTGGATTGATGATGCTGAATTCTGCGC       | CGGCTCGCAACCAGATGCTTTT              |                  |
| <i>Prp8</i>     | GCATAACCCATTTCCGCTCCGGTATG           | CCACACGCGCTGCGAGTCTATAA             |                  |
| <i>Gpdh</i>     | CGTCAAGTACCTGAAAGGACACAAGC           | CGAAGATCAGGATGTCAGCGTTCTTG          |                  |

  

| gene            | semi-qPCR Forward primer   | semi-qPCR Reverse primer |
|-----------------|----------------------------|--------------------------|
| <i>Abi</i>      | GCACAGGCCAGCGTTCTTTC       | ATGTTCTCGCTGGCCATGGG     |
| <i>alphaCOP</i> | TGACGTGTCACAATTTTCGACGATTG | AGGTGTCTCAAATTGGATGCACT  |
| <i>UTPase</i>   | TTTTCCGACGCTGTGTTAAA       | AGCATTCTCGGTGAGTTTGG     |
| <i>Rpn2</i>     | CCAACACTGTCTGCTTACC        | ATTTTCCAGCTGCGTTGTTT     |
| <i>Aats-Gly</i> | TCCAAGTCGAAATTCAGCCGA      | TGCAATCTGAGTTCTCACGGCT   |
| <i>loj</i>      | GCAATAGTCCACCTTAAGCAA      | CTGATCTCTTGCCACGTCA      |
| <i>Mtch</i>     | AAGTACCCGGCCACATTGCT       | ACGTGGTGGGTGGAGTGACT     |
| <i>CG33057</i>  | TCGCCACCTCTAATAGAAACGCA    | TGTTGAGTCCGGTGAGCTGA     |

  

| gene          | PCR template for dsRNA Forward primer             | PCR template for dsRNA Reverse primer          |
|---------------|---------------------------------------------------|------------------------------------------------|
| <i>Smn</i>    | TTAATACGACTCACTATAGGGAGACGAACTTGGTTCTTCCCTTAAAAAC | TAATACGACTCACTATAGGGAGATCTTTAATATAATAAATTTAATC |
| <i>CG6841</i> | TAATACGACTCACTATAGGGGATCTGGAATCGGAGACCAA          | TAATACGACTCACTATAGGGGGGAAATATTTGGAGGGCAT       |
| <i>Prp8</i>   | TAATACGACTCACTATAGGGACGATGTTAACTTGGGTGCGC         | TAATACGACTCACTATAGGGATCAAGCCTATGAGCGCTGT       |
